# Supplementary material for: Initiating Pharmacologic Treatment in Tobacco-Dependent Adults. An Official American Thoracic Society Clinical Practice Guideline
Source: PubMed Central journal article supplement — Am J Respir Crit Care Med. 2020 Jul 15;202(2):e5–e31. doi: 10.1164/rccm.202005-1982ST (PMC7365361; doi:10.1164/rccm.202005-1982st), 2020-07-15
Supplement: rccm.202005-1982ST_executive_summary.pdf [file rccm.202005-1982ST_executive_summary.pdf]

# AMERICAN THORACIC SOCIETY DOCUMENTS

## Initiating Pharmacologic Treatment in Tobacco-Dependent Adults An Official American Thoracic Society Clinical Practice Guideline: Executive Summary

Frank T. Leone\*, Yuqing Zhang\*, Sarah Evers-Casey, A. Eden Evins, Michelle N. Eakin, Joelle Fathi, Kathleen Fennig, Patricia Folan, Panagis Galiatsatos, Hyma Gogineni, Stephen Kantrow, Hasmeena Kathuria, Thomas Lamphere, Enid Neptune, Manuel C. Pacheco, Smita Pakhale, David Prezant, David P. L. Sachs, Benjamin Toll, Dona Upson, Dan Xiao, Luciane Cruz-Lopes, Izabela Fulone, Rachael L. Murray, Kelly K. O'Brien, Sureka Pavalagantharajah, Stephanie Ross, Yuan Zhang, Meng Zhu, and Harold J. Farber; on behalf of the American Thoracic Society Assembly on Clinical Problems

THIS OFFICIAL CLINICAL PRACTICE GUIDELINE WAS APPROVED BY THE AMERICAN THORACIC SOCIETY MAY 2020

**Background:** Current tobacco treatment guidelines have established the efficacy of available interventions, but they do not provide detailed guidance for common implementation questions frequently faced in the clinic. An evidence-based guideline was created that addresses several pharmacotherapy-initiation questions that routinely confront treatment teams.

**Methods:** Individuals with diverse expertise related to smoking cessation were empaneled to prioritize questions and outcomes important to clinicians. An evidence-synthesis team conducted systematic reviews, which informed recommendations to answer the questions. The GRADE (Grading of Recommendations, Assessment, Development, and Evaluation) approach was used to rate the certainty in the estimated effects and the strength of recommendations.

**Results:** The guideline panel formulated five strong recommendations and two conditional recommendations regarding pharmacotherapy choices. Strong recommendations include using varenicline rather than a nicotine patch, using varenicline rather than bupropion, using varenicline rather than a nicotine patch in adults with a comorbid psychiatric condition, initiating varenicline in adults even if they are unready to quit, and using controller therapy for an extended treatment duration greater than 12 weeks. Conditional recommendations include combining a nicotine patch with varenicline rather than using varenicline alone and using varenicline rather than electronic cigarettes.

**Conclusions:** Seven recommendations are provided, which represent simple practice changes that are likely to increase the effectiveness of tobacco-dependence pharmacotherapy.

**Keywords:** dependence; pharmacotherapy; smoking; tobacco; treatment

|                                   |                                           |                                         |
|-----------------------------------|-------------------------------------------|-----------------------------------------|
| <b>Contents</b>                   | <b>Methods</b>                            | <b>Evidence Synthesis</b>               |
| <b>Summary of Recommendations</b> | <b>Questions and Outcomes of Interest</b> | <b>Recommendations</b>                  |
| <b>Introduction</b>               | <b>Literature Search</b>                  | <b>PICO 1: Varenicline or Patch</b>     |
| <b>Disclaimer</b>                 |                                           | <b>PICO 2: Varenicline or Bupropion</b> |

\*Co-first authors.

ORCID IDs: 0000-0002-6637-0931 (J.F.); 0000-0002-9062-409X (H.K.).

This Executive Summary is part of the full official ATS clinical practice guideline, which readers may access online at <http://www.atsjournals.org/doi/abs/10.1164/rccm.202005-1982ST>. Only the Executive Summary is appearing in the print edition of the *Journal*. The article of record, and the one that should be cited, is: Initiating Pharmacologic Treatment in Tobacco-Dependent Adults: An Official American Thoracic Society Clinical Practice Guideline. *Am J Respir Crit Care Med* 2020;202:e5–e31.

Ⓜ You may print one copy of this document at no charge. However, if you require more than one copy, you must place a reprint order. Domestic reprint orders: amy.schrivner@sheridan.com; international reprint orders: louisamott@springer.com.

Correspondence and requests for reprints should be addressed to Frank T. Leone, M.D., M.S., Comprehensive Smoking Treatment Program, Penn Lung Center, Suite 251, Wright-Saunders Building, 51 North 39th Street, Philadelphia, PA 19104. E-mail: frank.tleone@uphs.upenn.edu.

This document has an online supplement, which is accessible from this issue's table of contents at [www.atsjournals.org](http://www.atsjournals.org).

Am J Respir Crit Care Med Vol 202, Iss 2, pp 173–183, Jul 15, 2020

Copyright © 2020 by the American Thoracic Society

DOI: 10.1164/rccm.202005-1982ST

Internet address: [www.atsjournals.org](http://www.atsjournals.org)

|                                                                                                                           |                                                                                                                           |                                                                                                            |
|---------------------------------------------------------------------------------------------------------------------------|---------------------------------------------------------------------------------------------------------------------------|------------------------------------------------------------------------------------------------------------|
| <p><b>PICO 3: Varenicline plus Patch or Varenicline Alone</b><br/> <b>PICO 4: Varenicline or Electronic Cigarette</b></p> | <p><b>PICO 5: Pretreat or Wait for "Ready"</b><br/> <b>PICO 6: Varenicline or Patch in Behavioral Health Patients</b></p> | <p><b>PICO 7: Extended or Standard Duration</b><br/> <b>Discussion</b><br/> <b>Patient Perspective</b></p> |
|---------------------------------------------------------------------------------------------------------------------------|---------------------------------------------------------------------------------------------------------------------------|------------------------------------------------------------------------------------------------------------|

**Summary of Recommendations**

1. **For tobacco-dependent adults in whom treatment is being initiated, we recommend varenicline over a nicotine patch** (strong recommendation, moderate certainty in the estimated effects). *Remarks: To promote adherence to pharmacologic therapy, providers should be prepared to counsel patients about the relative safety and efficacy of varenicline treatment compared with a nicotine patch.*
2. **For tobacco-dependent adults in whom treatment is being initiated, we recommend varenicline over bupropion** (strong recommendation, moderate certainty in the estimated effects).
3. **For tobacco-dependent adults in whom treatment is being initiated, we suggest varenicline plus a nicotine patch over varenicline alone** (conditional recommendation, low certainty in the estimated effects).
4. **For tobacco-dependent adults in whom treatment is being initiated, we suggest varenicline over electronic cigarettes** (conditional recommendation, very low certainty in the estimated effects). *Remarks: The recommendation's strength reflects very low certainty in the effects used to derive the recommendation. After our evidence synthesis, new evidence emerged regarding serious adverse effects of electronic cigarettes. If these serious adverse effects continue to be reported, the strength of the recommendation should be reevaluated. Note that this recommendation is intended for treatment of tobacco dependence under the supervision of a clinician; it should not be extrapolated to unsupervised treatment or recreational use.*
5. **In tobacco-dependent adults who are not ready to discontinue tobacco use, we recommend that clinicians begin treatment with varenicline rather than waiting until patients are ready to stop tobacco use** (strong recommendation,

moderate certainty in the estimated effects).

6. **For tobacco-dependent adults with comorbid psychiatric conditions, including substance-use disorder, depression, anxiety, schizophrenia, and/or bipolar disorder, for whom treatment is being initiated, we recommend varenicline over a nicotine patch** (strong recommendation, moderate certainty in the estimated effects).
7. **For tobacco-dependent adults for whom treatment is being initiated with a controller, we recommend using extended-duration (>12 wk) over standard-duration (6–12 wk)** (strong recommendation, moderate certainty in the estimated effects).

**Introduction**

In 1988, the U.S. Surgeon General described tobacco use as the cardinal sign of addiction to nicotine (1). Eight years later, the USPHS published the first comprehensive tobacco-dependence treatment guideline, establishing a new paradigm for clinical care (2, 3). As a result, a first principle of clinical practice was established: all patients who use tobacco should receive treatment for their dependence, rather than simply being encouraged to stop.

This guideline expands on the USPHS foundation. It answers pressing clinical questions regarding the initiation of tobacco-dependence pharmacotherapy. The goal is to improve patient-centered care for tobacco dependence by identifying a single evidence-based pathway that balances important outcomes, including short- and long-term tobacco abstinence and serious adverse events (SAEs), while accounting for important clinical variability. (Figure 1) It was not possible to include all possible pharmacotherapy combination choices nor was it feasible to account for all possible variations encountered in practice. This guideline was created with the assumption that accepted foundations of tobacco-dependence treatment are already in

practice (Box 1). The target audience for the recommendations in our guideline includes patients, physicians, other clinicians, nurses, and policy makers.

**Disclaimer**

It is important to realize that guidelines cannot account for all potential clinical circumstances. This guideline is not intended to supplant clinician judgment, and its recommendations should not be considered mandates. For all recommendations, we have considered the balance of desirable and undesirable effects, certainty of evidence, patients' values and preferences, resources required, equity, acceptability, and feasibility. Clinicians are encouraged to apply the recommendations in the clinical context of each individual patient, particularly regarding the patient's values and preferences.

**Methods**

Guideline recommendations were developed in accordance with principles outlined by the Institute of Medicine (now the National Academy of Medicine) (4). The GRADE (Grading of Recommendations, Assessment, Development, and Evaluation) approach was used to assess the certainty of evidence and to rate the strength of the recommendations (5–9). Panel composition, conflict-of-interest management, external review, and organizational approval all proceeded in accordance with American Thoracic Society (ATS) policies and procedures (10). The final panel included individuals with documented expertise in guideline methodology, behavioral health, health equity, nursing, pharmacy, and/or pediatrics. One member-in-training and one patient representative were included. Two committee members represented countries outside of North America. All panelists disclosed their potential conflicts of interest to the ATS. Most panelists were determined to have no substantial conflicts of interest and were approved to participate

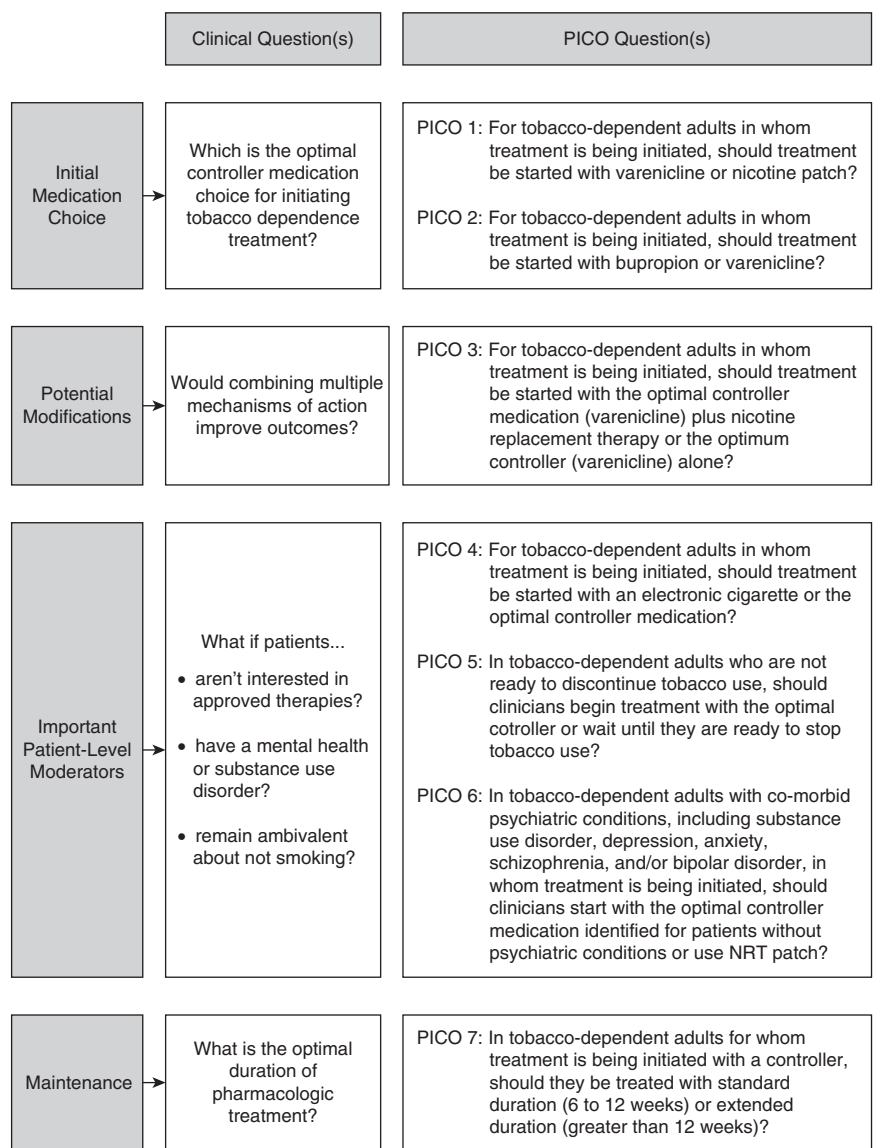

**Figure 1.** Logic model for identification of important clinical questions and translation into evaluable PICO-formatted questions. NRT = nicotine-replacement therapy; PICO = Population, Intervention, Comparator, Outcome.

without limitation. One panelist with a relevant industry relationship participated in discussions but was recused from formulating, grading, writing, or editing recommendations. The Guidelines in Intensive Care, Development, and Evaluation (GUIDE) Group provided methods support for this guideline.

**Questions and Outcomes of Interest**

Seven question in the PICO (Population, Intervention, Comparator, and Outcome) format were chosen for inclusion in the guideline (Figure 1). One question was discarded in May 2019 because of an

absence of evidence and was replaced with an alternative question (PICO 3), leading to a recommendation based on available evidence. After comparing varenicline, nicotine patches, and bupropion in questions 1 and 2, varenicline was shown to be the best controller of the three; therefore, varenicline replaced the “optimal controller” in questions 3 through 6 when formulating recommendations.

The panel selected and defined outcomes for each question *a priori* and then rated the importance of each using a 9-point scale (11). The panel identified two critically important outcomes relevant to all

questions: 1) abstinence, measured by biomarkers or self-report, for the 7 days before follow-up, performed at least 6 months after the target stop date, and 2) incidence of SAEs. Important outcomes also informed decision-making, including 1) abstinence during the treatment period, 2) tobacco-use relapse, 3) increase or decrease in other substance use, 4) quality of life, 5) severity of withdrawal, and 6) change in tobacco-use patterns.

**Literature Search**

A medical librarian worked with methodologists to identify available evidence without limits on publication date or language. The initial search was completed in January of 2019 and updated through October of 2019. For detailed search strategies, *see* online supplement.

**Evidence Synthesis**

The methodology team followed principles outlined in the *Cochrane Handbook for Systematic Reviews of Interventions*, using title and abstract screening, full-text screening, and data extractions performed independently and in duplicate (12). For each question, the GRADE “Evidence-to-Decision” framework was used to construct tables summarizing the results of systematic reviews (5, 6, 9).

Relative risks (RRs) were used to report analysis of dichotomous outcomes, mean differences were used for continuous outcomes, and hazard ratios were used for time-to-event outcomes. The absolute risk reduction (ARR) presents the result in terms of the anticipated increase or decrease in patients experiencing the effect per 1,000 patients treated (13). The lead methodologists categorized the certainty in the estimated effects into four degrees ranging from very low to high, as determined by considering the risk of bias, precision, consistency, directness, likelihood of publication bias, presence of a dose–effect relationship, and potential effect of residual and opposing confounding (7, 8, 14). Panel members reviewed the evidence profiles and Evidence-to-Decision tables (*see* online supplement) and provided feedback on the completeness of the data set.

Recommendations were formulated after panel members evaluated the benefits and harms, certainty in the estimated effects, assumptions about values and preferences, resource use, feasibility, acceptability, and

**Box 1. Foundations of Tobacco Dependence Treatment:**

1. All patients should be screened for tobacco use, and the potential diagnosis of tobacco dependence should be assessed.
2. The diagnosis of tobacco dependence, as well as the toxic effects of tobacco exposure, should be incorporated into the patient's problem list.
3. Simply encouraging patients to stop smoking is insufficient. All patients who use tobacco should be provided with evidence-based treatment, including pharmacotherapy, to help them stop.
4. Tobacco-dependence interventions require longitudinal follow-up, akin to the longitudinal evaluation and management of other chronic illnesses.

Based on Reference 3.

equity impact of various courses of action. The strengths of the recommendations were rated using established GRADE criteria (15). Consensus on the direction and strength of recommendations, and on associated remarks, was achieved through discussion and iterative voting. Panelists with dissenting opinions were given the opportunity to record the rationale for their dissent. A summary of certainty assessments, selected relative and absolute effects, and resulting recommendations for each PICO question are presented in Table 1. Detailed evidence tables, including all outcomes of interest, are available in the full, online version of the guideline, available at <http://www.thoracic.org/statements/> and summarized below.

## Recommendations

### PICO 1: Varenicline or Patch

To begin establishing an “optimal controller” medication, the panel first evaluated the relative effectiveness of a nicotine patch and varenicline. Our systematic review identified 14 randomized controlled trials (RCTs) directly comparing the efficacy of varenicline with that of a nicotine patch. Eleven RCTs reported exhaled carbon monoxide-verified abstinence at 6 months after treatment, and nine reported abstinence during the 10- to 12-week treatment period (11, 16–22). Compared with a nicotine patch, varenicline increased both long-term abstinence (RR, 1.20; 95% confidence interval [95% CI], 1.09–1.32; ARR, 40 more per 1,000 patients) and abstinence during the treatment period (RR, 1.40; 95% CI,

1.31–1.49; ARR, 101 more per 1,000 patients) (11, 16–24). Varenicline also likely reduced the risk of SAEs compared with the patch (RR, 0.72; 95% CI, 0.52–1.00; ARR, 3 fewer per 1,000 patients) (11, 16, 18, 19, 21–23, 25, 26). Certainty in the estimated effects was high for both 6-month and treatment-period abstinence, whereas it was moderate for SAE estimated effects because of serious imprecision.

The panel concluded 1) that varenicline is superior in achieving long-term abstinence when compared with a nicotine patch and 2) that varenicline is associated with fewer SAEs than a nicotine patch. On balance, the panel concluded that the clinical superiority of varenicline (balance of effect) outweighs its higher price and the possibly important uncertainty or variability of patients' values and preferences. The panel made a **strong recommendation to use varenicline over a nicotine patch**. *Remarks: To promote adherence to pharmacologic therapy, providers should be prepared to counsel patients about the relative safety and efficacy of varenicline treatment compared with a nicotine patch.*

### PICO 2: Varenicline or Bupropion

Identifying an optimal controller next required evaluating the relative effectiveness of varenicline and bupropion. Our systematic review identified seven RCTs comparing varenicline with bupropion; four ( $n = 5,626$ ) evaluated abstinence at 6-month follow-up (16, 27–29) and five ( $n = 5,655$ ) evaluated abstinence during treatment (16, 27–30). Varenicline increased abstinence at 6-month follow-up (RR, 1.30; 95% CI, 1.19–1.42; ARR, 77 more per 1,000

patients) and during active treatment (RR, 1.41; 95% CI, 1.32–1.52; ARR, 147 more per 1,000 patients) while probably reducing the risk of SAEs compared with bupropion (RR, 0.81; 95% CI, 0.57–1.16; ARR, 3 fewer per 1,000 patients). Certainty in the estimated effects was high for 6-month and active treatment abstinence but was moderate for SAEs because of imprecision.

The panel concluded 1) that varenicline showed a large, desirable effect in achieving abstinence compared with bupropion, with high-certainty evidence, and 2) that varenicline treatment likely results in little to no difference in SAEs compared with bupropion. On balance, the panel concluded that the clinical superiority (balance of effect) of varenicline outweighs its higher price and the possibly important uncertainty or variability of patients' values and preferences. As a result, the panel chose to make a **strong recommendation to use varenicline over bupropion**.

### PICO 3: Varenicline plus Patch or Varenicline Alone

Given varenicline's agonist-antagonist properties, it is commonly held that combining varenicline with nicotine pharmacotherapy should be of limited utility (31). However, nicotine's effects on the brain are complex and extend beyond the nicotinic receptor system. With varenicline being the optimal controller for initiation, it became important to evaluate whether supplementing varenicline with nicotine-replacement therapy would be better than using varenicline alone. Our review identified three treatment trials that directly compared varenicline combined with a nicotine patch to varenicline alone, two of which ( $n = 776$ ) reported on smoking abstinence at 6 months (32, 33) and three ( $n = 893$ ) of which compared adverse events (32–34). Varenicline plus a nicotine patch significantly increased 6-month (RR, 1.36; 95% CI, 1.07–1.72; ARR, 105 more per 1,000 patients) and during-treatment (RR, 1.31; 95% CI, 1.11–1.54; ARR, 112 more per 1,000 patients) abstinence compared with varenicline alone. The combination trivially increased SAEs (RR, 1.06; 95% CI, 0.27–4.05; ARR, 1

**Table 1.** Summary of Estimated Effects of Intervention versus Comparator, with Consequent Recommendation for Each of the Seven PICO Questions Assessed

| Intervention                  | Comparator           | Point-Prevalence Abstinence*  | Absolute Effect† | Treatment Abstinence‡ | Absolute Effect† | Adverse Events   | Absolute Effect† | Evidence Certainty | Recommendation                   |
|-------------------------------|----------------------|-------------------------------|------------------|-----------------------|------------------|------------------|------------------|--------------------|----------------------------------|
| PICO 1<br>Varenicline         | Patch                | 1.20 (1.09–1.32)              | 40 more/1,000    | 1.40 (1.31–1.49)      | 101 more/1,000   | 0.72 (0.52–1.00) | 3 fewer/1,000    | High               | Strong: favors intervention      |
| PICO 2<br>Varenicline         | Bupropion            | 1.30 (1.19–1.42)              | 77 more/1,000    | 1.41 (1.32–1.52)      | 147 more/1,000   | 0.81 (0.57–1.16) | 3 fewer/1,000    | High               | Strong: favors intervention      |
| PICO 3<br>Varenicline + patch | Varenicline alone    | 1.36 (1.07–1.72)              | 105 more/1,000   | 1.31 (1.11–1.54)      | 112 more/1,000   | 1.06 (0.27–4.05) | 1 more/1,000     | Low                | Conditional: favors intervention |
| PICO 4<br>Varenicline         | Electronic cigarette | 1.44 (0.75–2.80)              | 143 more/1,000   | No estimate           | No estimate      | No estimate      | No estimate      | Very low           | Conditional: favors intervention |
| PICO 5<br>Pretreat            | Wait                 | 2.00 (1.70–2.35)              | 173 more/1,000   | 2.49 (2.09–2.98)      | 308 more/1,000   | 1.75 (0.98–3.13) | 12 more/1,000    | High               | Strong: favors intervention      |
| PICO 6<br>Varenicline         | Patch                | 1.31 (1.12–1.53)              | 36 more/1,000    | 1.78 (0.78–4.08)      | 108 more/1,000   | 0.95 (0.54–1.67) | 1 fewer/1,000    | Moderate           | Strong: favors intervention      |
| PICO 7<br>>12 wk              | ≤12 wk               | 1.22 <sup>§</sup> (1.07–1.39) | 53 more/1,000    | N/A                   | N/A              | 1.37 (0.79–2.36) | 3 more/1,000     | Moderate           | Strong: favors intervention      |

*Definition of abbreviations:* N/A = not available; PICO = Population, Intervention, Comparator, and Outcome. Numerical data are shown as the relative risk (95% confidence interval) or patients/patients treated. For complete evidence tables, together with results of the Evidence-to-Decision process, see online supplement.

\*Seven-day point-prevalence abstinence assessed at 6-month follow-up.

†Estimated number of additional (or fewer) patients achieving outcome with intervention.

‡Seven-day point-prevalence abstinence achieved during treatment period.

§PICO 7 long-term abstinence assessed at 12-month follow-up.

more per 1,000 patients) (32–34). Certainty was high for abstinence during 6-month follow-up and active treatment, whereas it was low for SAE estimates because of very serious imprecision.

The panel concluded 1) that varenicline plus a nicotine patch showed a large desirable effect compared with varenicline alone in smoking abstinence and 2) that varenicline plus a nicotine patch may increase the risk of SAEs only slightly compared with varenicline alone. As a result, the panel chose to make a **conditional recommendation in favor of varenicline plus a nicotine patch over varenicline alone**.

#### **PICO 4: Varenicline or Electronic Cigarette**

Despite the established efficacy of U.S. Food and Drug Administration–approved pharmacologic agents for tobacco dependence, a significant number of clinicians have recommended electronic cigarettes (e-cigarettes) to help their patients stop smoking (35–37). With varenicline as the optimum controller, the panel believed it important to evaluate whether varenicline or e-cigarettes should be used to treat tobacco-dependent adults. Our systematic review identified one conference abstract reporting an RCT and one observational study directly comparing varenicline with e-cigarettes. The trial recruited 54 smokers with a history of acute coronary syndrome and provided insufficient methodologic information to assess certainty (38). The observational study reported 1-year (mean) follow-up of 3,093 individuals attempting to quit smoking, including 156 using varenicline and 200 using e-cigarettes (39). Because of the paucity of direct evidence, the panel also considered indirect evidence. Eleven randomized trials comparing varenicline with nicotine replacement (11, 16–24) and two randomized trials comparing e-cigarettes with nicotine replacement (40, 41) were selected, and a network meta-analysis including 8,830 individuals was performed. The RCT suggested an increase in self-reported abstinence of 14.8% (95% CI, 3.9% to 25.8%), supported by the observational data suggesting a non–statistically significant increase in continuous abstinence at 6-month follow-up (mean difference, +4.6%; 95%

CI –1.8% to +11%) compared with e-cigarettes. The indirect evidence suggested varenicline might lead to a non–statistically significant decrease in abstinence at 6-month assessment (RR, 0.85; 95% CI, 0.65 to 1.10; ARR, 42 fewer per 1,000 patients) but might lead to increased abstinence at 3-month assessment (RR, 1.10; 95% CI, 0.73 to 1.60; ARR, 22 more per 1,000 patients). Varenicline might decrease the risk of SAEs compared with e-cigarettes (RR, 0.32; 95% CI, 0.071 to 0.82; ARR, 52 fewer per 1,000 patients). Certainty in direct evidence was very low because of inconsistency and a serious risk of bias, and indirect-evidence certainty was very low because of indirectness, imprecision, and risk of bias.

The panel concluded 1) that varenicline showed an uncertain benefit compared with e-cigarettes in abstinence or relapse and 2) that varenicline might have fewer adverse events than e-cigarettes. As a result, the panel made a **conditional recommendation favoring varenicline over e-cigarettes**. *Remarks: The recommendation's strength reflects very low certainty in the effects used to derive the recommendation. After our evidence synthesis, new evidence emerged regarding serious adverse effects of e-cigarettes. If these serious adverse effects continue to be reported, the strength of the recommendation should be reevaluated. Note that this recommendation is intended for treatment of tobacco dependence under the supervision of a clinician; it should not be extrapolated to unsupervised treatment or recreational use.*

The panel made several important observations related to the generalizability of the indirect comparison of varenicline with e-cigarettes. Significant differences in the way nicotine is used (i.e., common comparator) in studies evaluating varenicline or e-cigarettes likely impact effect estimates. In addition, target outcomes are different, with varenicline outcomes reflecting discontinuation of smoking and e-cigarette outcomes reflecting a delivery substitution. E-cigarettes appear to carry their own unique risk profile, with wide variability in effects across product categories, aerosol constituents, ages of initiation, and consumer use patterns (42). The panel, aware of large epidemiologic studies of the respiratory and cardiovascular impact of e-cigarette use,

emphasized that the overall health consequences of e-cigarette use have become increasingly suspect (43–45); conversely, the initial safety concerns over varenicline have diminished (46, 47).

Although there was unanimity among the panel regarding the preferred intervention, four panelists (H.J.F., P.G., S. Pakhale, and M.C.P.) advocated for a strong, rather than conditional, recommendation. They were concerned about the safety and effectiveness of e-cigarettes because of case reports that were not included in the evidence synthesis. They cited reports of deaths or disability due to e-cigarette- or vaping-associated lung injury (48–51), burns due to product explosion, acute nicotine poisoning, and seizures, as well as histopathologic injuries in laboratory studies. They noted that such concerns have prompted warnings about e-cigarettes from numerous organizations, each recommending that clinicians rely on medications approved by the U.S. Food and Drug Administration or other regulatory agencies instead of relying on alternative modalities that lack an established evidentiary base (48, 52–55). Two nonvoting panelists later joined the dissent (P.F. and T.L.), but these panelists were unavailable to participate in the panel discussions of the evidence or the formulation and grading of the recommendation.

In August 2019, the CDC issued a Health Advisory based on a collection of cases of severe lung injury related to the use of e-cigarettes (48). Since then, the number of reported cases of vaping-associated pulmonary injury has risen precipitously, and these cases have resulted in a number of deaths (49–51). The panel carefully reviewed the recognized GRADE circumstances in which low-certainty evidence could be used to inform a strong recommendation and concluded that although the syndrome is dramatic in its presentation and tragic in its consequences, the nature of the evidence precluded upgrading the recommendation to strong at this time (15). This recommendation is based on an effort to compare use of varenicline with use of e-cigarettes exclusively within the context of tobacco-dependence treatment and should not be interpreted as an implicit statement of the relative value of e-cigarettes for public health.

#### **PICO 5: Pretreat or Wait for “Ready”**

The idea that “readiness to quit” should be assessed has been prominent in tobacco

treatment strategies because of near-universal initial acceptance of the transtheoretical model of behavior change (56). More recently, the relevance of the model has come into question on the basis of observations of the dynamic nature of behavior change (57). Although patients may not be ready to abstain, they may be willing to try tobacco-dependence treatment (58). The panel posed a question evaluating the relative effect of initiating optimal controller therapy *before* patients express a readiness to abstain. Our systematic review identified four RCTs addressing efficacy of treatment initiation in smokers unready to abstain (i.e., “pretreatment”) (59–62) and identified a fifth evaluating the 15-day experimental effect of varenicline in non-treatment-seeking smokers (63). Self-reported abstinence was biochemically confirmed with exhaled carbon monoxide.

More smokers were able to stop smoking when treated with varenicline, despite initial reluctance. Abstinence at 6-month follow-up (RR, 2.00; 95% CI, 1.70–2.35; ARR, 173 more per 1,000 patients) and 24-week follow-up (RR, 2.49; 95% CI, 2.09–2.98; ARR, 308 more per 1,000 patients) increased with varenicline compared with waiting for affirmation of readiness. Varenicline likely increased SAEs (RR, 1.75; 95% CI, 0.98–3.13; ARR, 12 more per 1,000 patients). Certainty in estimates was high for abstinence at both points and was moderate for SAEs because of imprecision. The evidence suggests varenicline pretreatment would be acceptable to stakeholders (64–67). In addition, the panel considered varenicline pretreatment to be more clinically feasible than asking patients to quit immediately.

The panel concluded 1) that the initiation of varenicline treatment in smokers not ready to abstain showed a large effect on abstinence, with high-certainty evidence, and 2) that initiation of pretreatment showed a small increase in SAEs, with moderate-certainty evidence. As a result, the panel concluded that the clinical superiority (balance of effect) of varenicline in smokers not ready to abstain outweighs its higher price and the possibly important uncertainty or variability of patients’ values and preferences. The panel chose to make a **strong recommendation in favor of beginning varenicline treatment in patients who are not ready to quit, rather than waiting for affirmation of readiness**. Of note, the panel

recognized a potential threat to patient autonomy if the proactive approach is misapplied, whereas autonomy is preserved when patients are engaged in discussion regarding initiating pharmacotherapy with continued smoking and their right to decline treatment is respected.

#### **PICO 6: Varenicline or Patch in Behavioral Health Patients**

Early black-boxed warnings regarding possible neuropsychiatric adverse effects of varenicline and bupropion limited uptake, despite stemming from case reports and postmarketing surveillance. No early RCT found evidence for these events. In light of persistent stigma assigned to varenicline within the behavioral health community, the panel believed it important to evaluate the evidence guiding the clinical question of whether varenicline or nicotine should be used in adults with comorbid psychiatric conditions (68). Our systematic review identified two RCTs ( $n = 2,194$ ) directly comparing varenicline with the nicotine patch in a cohort of participants with mental illness (16, 23). Both studies assessed abstinence at 6-month follow-up, abstinence during treatment, and SAE rates. Compared with a nicotine patch, varenicline increased abstinence at 6-month follow-up (RR, 1.31; 95% CI, 1.12–1.53; ARR, 36 more per 1,000 patients) and likely increased abstinence at the end of 12-week treatment (RR, 1.78; 95% CI, 0.78–4.08; ARR, 108 more per 1,000 patients) while probably also decreasing the risk of SAEs (RR, 0.95; 95% CI, 0.54–1.67; ARR, 1 fewer per 1,000 patients). There was one RCT that evaluated the impact of varenicline on use of other substances, which was judged to be unclear because of very low certainty in the evidence (alcohol: RR, 0.56; 95% CI, 0.24–1.3; ARR, 128 fewer per 1,000 patients; other substances: RR, 1.42; 95% CI, 0.71–2.87; ARR, 108 more per 1,000 patients). Certainty in SAE effects was moderate because of serious imprecision, with 95% CIs that could lead to opposing conclusions. The impact of varenicline on risks of other substance use was judged to be of very low certainty because of a serious risk of bias and very serious imprecision due to the small number of events. The panel considered both interventions to be acceptable to stakeholders and to be increasingly feasible to implement with the boxed warning removed.

Compared with nicotine, the panel concluded that varenicline 1) may result in a large benefit for abstinence and 2) would likely result in little to no difference in SAEs, with both results having moderate certainty in the estimated effects, in patients with substance-use or psychiatric disorders. As a result, the panel concluded that the clinical superiority (balance of effect) of varenicline in patients with substance-use or psychiatric disorders outweighs its higher price and the possibly important uncertainty or variability of patients’ values and preferences. The panel chose to make a **strong recommendation in favor of initiating varenicline over the patch in patients with comorbid psychiatric conditions, including substance-use disorder, depression, anxiety, schizophrenia, and/or bipolar disorder**.

#### **PICO 7: Extended or Standard Duration**

Relapse after pharmacologic discontinuation is common (69). Among the various strategies aimed at preventing relapse, an extended duration of treatment has been effective at modifying sustained abstinence rates in some contexts (70). The panel found guidance on treatment duration to be of critical importance, comparing extended therapy (i.e., >12 wk) with standard-duration therapy (8–12 wk). Our systematic review identified 12 studies that directly compared extended with standard-duration controller therapy with varenicline, bupropion, or nicotine (71–81). Eight studies ( $n = 3,711$ ) provided data for the primary abstinence at 12-month analysis, and five reported SAE data (76, 78, 79, 81). Compared with standard-duration controller therapy, extended-duration therapy probably increased abstinence at 1-year follow-up (RR, 1.22; 95% CI, 1.07–1.39; ARR, 53 more per 1,000 patients) and probably reduced relapse assessed at 12–18 months after initiation of therapy (hazard ratio, 0.43; 95% CI, 0.29–0.64). Compared with standard-duration controller therapy, extended-duration therapy probably increased SAEs slightly (RR, 1.37; 95% CI, 0.79–2.36; ARR, 3 more per 1,000 patients). Certainty in the estimated abstinence at 12 months was moderate because of a serious risk of bias. Certainty in estimated SAE effects was moderate because of serious imprecision. The panel considered extended-duration therapy to be acceptable to stakeholders and feasible to implement.

**Box 2. Evidence-based Tobacco Dependence Treatment Recommendations:**

1. In tobacco-dependent adults for whom treatment is being initiated, we recommend using varenicline over a nicotine patch.
2. For tobacco-dependent adults for whom treatment is being initiated, we recommend using varenicline over bupropion.
3. In tobacco-dependent adults for whom treatment is being initiated, we suggest offering varenicline plus a nicotine patch over using varenicline alone.
4. For tobacco-dependent adults for whom treatment is being initiated, we suggest using varenicline over electronic cigarettes.
5. In tobacco-dependent adults who are not ready to discontinue tobacco use, clinicians should begin treatment with varenicline rather than waiting until patients are ready to stop tobacco use.
6. For tobacco-dependent adults with comorbid psychiatric conditions, including substance-use disorder, depression, anxiety, schizophrenia, and/or bipolar disorder, for whom treatment is being initiated, we recommend using varenicline over a nicotine patch.
7. For tobacco-dependent adults for whom treatment is being initiated, we recommend using extended-duration (>12 wk) controller therapy.

Development details and the evidence base are available at <http://www.thoracic.org/statements/>.

The panel concluded 1) that more than 12 weeks of pharmacotherapy provides a large benefit compared with standard treatment courses of fewer than 12 weeks, with increased abstinence and decreased relapse rates having moderate-certainty evidence, and 2) that extended-duration therapy probably does not increase or decrease SAEs compared with standard-duration therapy, with outcomes showing moderate-certainty evidence. As a result, the panel chose to make a **strong recommendation for extended-duration treatment of tobacco dependence beyond 3 months**, including regimens of up to 12 months in duration, considering that the clinical superiority (balance of effect) of extended-duration treatment outweighs its higher price and the possibly important uncertainty or variability of patients' values and preferences.

**Discussion**

From our 21st-century perspective, clinicians engage tobacco use as the cardinal manifestation of a disturbance in the brain's molecular-learning mechanisms, extending

the treatment team's responsibility beyond encouraging quitting to include maximizing longitudinal control over the compulsion to smoke. The guideline brings clarity to complex clinical decision-making and addresses several limiting misconceptions, including the value of combination pharmacotherapy, the approach to patients reluctant to stop smoking, and the safety and efficacy of treating vulnerable behavioral health populations. Pragmatically, these 7 recommendations (Box 2) provide straightforward suggestions for individual practice change, amplifying the clinician's ability to check preventable illness. Ideally, they also represent a new set of practice standards for treatment teams, health systems, and payers.

The main limitation of our guideline is the limited number of recommendations included. Because our objective was to identify a functional, evidence-based pharmacotherapy pathway, we began the process by identifying an optimal controller medication on which to build additional clinical recommendations. By necessity, our guideline could not address all possible pharmacotherapy options.

**Patient Perspective**

In 1967, as a young college freshman, I made the decision to smoke—the worst I ever made. I can tell you from experience that the addiction to smoking is real. Every day is going to be the day to quit, but every moment brings reminders that addiction to cigarettes is stronger than the will to quit. Days, months, and years go by, but the quit date keeps getting pushed further into the future.

All smokers face the possibility of lung cancer, heart disease, and other debilitating illnesses, in addition to the societal stigma that tobacco use carries. It's not surprising that most smokers really do want to quit. Healthcare professionals have a prominent role to play in tobacco dependence. They have the trust of their patients, and their voices are heard across a vast range of social, economic, and political arenas. By developing effective pathways for treating tobacco dependence, the ATS is taking important steps toward changing the impact tobacco dependence will have on future generations. ■

This official clinical practice guideline was prepared by an *ad hoc* subcommittee of the ATS Assembly on Clinical Problems.

**Members of the subcommittee are as follows:**

HAROLD J. FARBER, M.D., M.S.P.H.<sup>1</sup>  
(Co-Chair)

FRANK T. LEONE, M.D., M.S.<sup>2</sup> (Co-Chair)

LUCIANE CRUZ-LOPES, SC.D., M.Sc.<sup>3\*</sup>

MICHELLE N. EAKIN, PH.D.<sup>4</sup>

A. EDEN EVINS, M.D., M.P.H.<sup>5</sup>

SARAH EVERS-CASEY, M.P.H.<sup>2</sup>

JOELLE FATHI, D.N.P., M.N.<sup>6</sup>

KATHLEEN FENNIG<sup>7‡</sup>

PATRICIA FOLAN R.N., D.N.P.<sup>8</sup>

IZABELA FULONE, PH.D.<sup>3\*</sup>

PANAGIS GALIATSATOS, M.D., M.H.S.<sup>4</sup>

HYMA GOGINENI, PHARM.D., M.Sc.<sup>9,10</sup>

STEPHEN KANTROW, M.D.<sup>11</sup>

HASMEENA KATHURIA, M.D.<sup>12</sup>

THOMAS LAMPHERE, B.S., R.R.T.-A.C.C.S.,  
R.P.F.T.<sup>13</sup>

RACHAEL L. MURRAY, PH.D.<sup>14\*</sup>

ENID NEPTUNE, M.D., PH.D.<sup>4</sup>



KELLY K. O'BRIEN, M.L.I.S.<sup>15§</sup>  
 MANUEL C. PACHECO, M.D., M.Sc.<sup>16,17,18</sup>  
 SMITA PAKHALE, M.D., M.Sc.<sup>19</sup>  
 SUREKA PAVALAGANTHARAJAH, B.H.Sc.<sup>20\*</sup>  
 DAVID PREZANT, M.D.<sup>21</sup>  
 STEPHANIE ROSS, Ph.D.<sup>22\*</sup>  
 DAVID P. L. SACHS, M.D.<sup>23</sup>  
 BENJAMIN TOLL, Ph.D.<sup>24</sup>  
 DONA UPSON, M.D.<sup>25</sup>  
 DAN XIAO, M.D., Ph.D.<sup>26</sup>  
 YUAN ZHANG, Ph.D.<sup>22\*</sup>  
 YUQING ZHANG, M.D., M.Sc., Ph.D.<sup>22||</sup>  
 MENG ZHU, Ph.D.<sup>22\*</sup>

\*Methodologist.

†Patient representative.

§Medical librarian.

||Lead methodologist.

<sup>1</sup>Department of Pediatrics, Division of Pulmonary Medicine, Texas Children's Hospital and Baylor College of Medicine, Houston, Texas;

<sup>2</sup>Comprehensive Smoking Treatment Program, Perelman School of Medicine, University of Pennsylvania, Philadelphia, Pennsylvania;

<sup>3</sup>Pharmaceutical Science Graduate Course, University of Sorocaba, Sorocaba, São Paulo, Brazil; <sup>4</sup>Division of Pulmonary and Critical Care Medicine, Johns Hopkins University, Baltimore, Maryland; <sup>5</sup>Department of Psychiatry, Massachusetts General Hospital, Harvard University, Cambridge, Massachusetts;

<sup>6</sup>Department of Biobehavioral Nursing and Health Informatics, School of Nursing, University of Washington, Seattle, Washington; <sup>7</sup>Public Advisory Roundtable, American Thoracic Society, New York, New York; <sup>8</sup>Center for Tobacco Control, Northwell Health, Great Neck, New York; <sup>9</sup>College of Pharmacy, Western University of Health Sciences, Pomona, California; <sup>10</sup>Veterans Affairs Loma Linda Ambulatory Care Center, Redlands, California;

<sup>11</sup>Department of Pulmonary Medicine, School of Medicine, Louisiana State University, New Orleans, Louisiana; <sup>12</sup>Department of Pulmonary

and Critical Care Medicine, Boston University Medical Center, Boston, Massachusetts; <sup>13</sup>Pennsylvania Society for Respiratory Care, Philadelphia, Pennsylvania; <sup>14</sup>Division of Epidemiology and Public Health, University of Nottingham, Nottingham, United Kingdom; <sup>15</sup>Library and Archives, American Dental Association, Chicago, Illinois; <sup>16</sup>Department of Internal Medicine and Pulmonology, Technological University of Pereira, Pereira, Colombia; <sup>17</sup>Colombian Association of Pulmonology and Thoracic Surgery, Bogotá, Colombia; <sup>18</sup>Colombian Association of Internal Medicine, Bogotá, Colombia; <sup>19</sup>Department of Pulmonology, Ottawa Hospital Research Institute, Ottawa, Ontario, Canada; <sup>20</sup>Michael G. DeGroote School of Medicine and <sup>22</sup>Department of Health Research Methods, Evidence, and Impact, McMaster University, Hamilton, Ontario, Canada; <sup>21</sup>Fire Department of New York, New York, New York; <sup>23</sup>Palo Alto Center for Pulmonary Disease Prevention, Palo Alto, California; <sup>24</sup>Hollings Cancer Center, Medical University of South Carolina, Charleston, South Carolina; <sup>25</sup>Department of Pulmonary Medicine, New Mexico Veterans Affairs Health Care System, Albuquerque, New Mexico; and <sup>26</sup>Tobacco Medicine and Tobacco Cessation Center, Center of Respiratory Medicine, China-Japan Friendship Hospital, Beijing, China

**Author Disclosures:** A.E.E. received research support and served on an advisory committee for Pfizer; received support from the National Cancer Institute for a study on testing an organizational change model to address smoking in mental healthcare; received research support from the National Institute on Mental Health for a trial on integrated smoking cessation, exercise, and weight management in serious mental illness (Achieve); received research support from Patient-Centered Outcomes Research Institute for a study of facilitators and barriers to implementation of integrated smoking cessation treatment for smokers with serious mental illness; and

received a Career Award from the National Institute on Drug Abuse for mentoring in addiction treatment research. H.G. received research support from Western University of Health Sciences for a study on pharmacists' knowledge and attitudes about electronic cigarettes. S. Pakhale received research support from the Canadian Institute of Health Research for a study on nicotine reduction therapy and e-cigarettes, using the marketed e-cigarette NJOY as a study instrument. D.P. reported potential 2020 Research Support from the CDC/National Institute for Occupational Safety and Health for a study on tobacco cessation in firefighters, using varenicline as a study instrument. D.P.L.S. served on an advisory committee for Pfizer; and has noncommercialized intellectual property—U.S. patent 6,602,892—Methods for Nicotine Replacement Dosage Determination. B.T. served on an advisory committee for Pfizer; testifies on behalf of plaintiffs on litigation filed against the tobacco companies; and received research support from the National Cancer Institute. H.J.F., F.T.L., L.C.-L., M.N.E., S.E.-C., J.F., K.F., P.F., I.F., P.G., S.K., H.K., T.L., R.L.M., E.N., K.K.O'B., M.C.P., S. Pavalagantharajah, S.R., D.U., D.X., Yuan Zhang, Yuqing Zhang, and M.Z. reported no relevant commercial relationships.

**Acknowledgment:** The authors thank the thousands of volunteer participants who contributed their time and effort to developing this evidence base. They thank Dr. Kevin Wilson, ATS Documents Editor, for significant methodologic contributions and guidance during the document development phase. Without his efforts, this guideline would not have been possible. They also thank Ms. Kimberly Lawrence (ATS staff) for implementation assistance and production guidance. Without her considerable abilities managing a collaborative work environment, we could not have accomplished the goals of this project. Methodological support for this guideline was provided by the GUIDE group (<https://guidecanada.org>).

References

1. U.S. Department of Health and Human Services. The health consequences of smoking: nicotine addiction. A report of the Surgeon General; Atlanta, GA: U.S. Department of Health and Human Services; Office on Smoking and Health, National Center for Chronic Disease Prevention and Health Promotion, CDC; 1988 [accessed 2019 Aug 7]. Available from: <https://www.ncbi.nlm.nih.gov/books/NBK44695/>.
2. Fiore MC, Bailey WC, Cohen SJ, Dorfman SF, Goldstein MG, Gritz ER, et al.; Smoking Cessation Guideline Panel. Clinical practice guideline: smoking cessation. Rockville, MD: U.S. Department of Health and Human Services, USPHS, Agency for Health Care Policy and Research; 1996.
3. Fiore MC, Jaén CR, Baker TB, Bailey WC, Benowitz N, Curry SJ, et al.; Tobacco Use and Dependence Guideline Panel. Treating tobacco use and dependence: 2008 update: clinical practice guideline. Rockville, MD: USPHS, U.S. Department of Health and Human Services; 2008.
4. Institute of Medicine. Clinical practice guidelines we can trust. Washington, DC: National Academies Press; 2011 [created 2011; accessed 2020 Jun 20]. Available from: [https://www.awmf.org/fileadmin/user\\_upload/Leitlinien/International/IOM\\_CPG\\_lang\\_2011.pdf](https://www.awmf.org/fileadmin/user_upload/Leitlinien/International/IOM_CPG_lang_2011.pdf).

5. Alonso-Coello P, Schünemann HJ, Moberg J, Brignardello-Petersen R, Akl EA, Davoli M, et al.; GRADE Working Group. GRADE Evidence to Decision (EtD) frameworks: a systematic and transparent approach to making well informed healthcare choices. 1: Introduction. *BMJ* 2016; 353:i2016.
6. Alonso-Coello P, Oxman AD, Moberg J, Brignardello-Petersen R, Akl EA, Davoli M, et al.; GRADE Working Group. GRADE Evidence to Decision (EtD) frameworks: a systematic and transparent approach to making well informed healthcare choices. 2: Clinical practice guidelines. *BMJ* 2016;353:i2089.
7. Guyatt G, Oxman AD, Akl EA, Kunz R, Vist G, Brozek J, et al. GRADE guidelines: 1. Introduction-GRADE evidence profiles and summary of findings tables. *J Clin Epidemiol* 2011;64: 383-394.
8. Guyatt GH, Oxman AD, Vist GE, Kunz R, Falck-Ytter Y, Alonso-Coello P, et al.; GRADE Working Group. GRADE: an emerging consensus on rating quality of evidence and strength of recommendations. *BMJ* 2008;336:924-926.
9. Schünemann HJ, Mustafa R, Brozek J, Santesso N, Alonso-Coello P, Guyatt G, et al.; GRADE Working Group. GRADE Guidelines: 16. GRADE evidence to decision frameworks for tests in clinical practice and public health. *J Clin Epidemiol* 2016; 76:89-98.

10. ATS Documents Unit. American Thoracic Society guidelines packet. New York, NY: American Thoracic Society; 2018 [accessed 2019 Sep 30]. Available from: <https://www.thoracic.org/statements/document-development/resources/gats.pdf>.
11. Aubin H-J, Bobak A, Britton JR, Oncken C, Billing CB Jr, et al. Varenicline versus transdermal nicotine patch for smoking cessation: results from a randomised open-label trial. *Thorax* 2008;63:717-724.
12. Higgins J, Thomas J, Chandler J, Cumpston M, Li T, Page M, et al. Cochrane handbook for systematic reviews of interventions. 2nd ed. Chichester, United Kingdom: John Wiley & Sons; 2019. Available from: [www.training.cochrane.org/handbook](http://www.training.cochrane.org/handbook).
13. Irwig L, Irwig J, Trevena L, Sweet M. Relative risk, relative and absolute risk reduction, number needed to treat and confidence intervals. In: Smart choices: making sense of health advice. London, United Kingdom: Hammersmith Press; 2008 [accessed 2019 Oct 7]. Available from: <https://www.ncbi.nlm.nih.gov/books/NBK63647/>.
14. Atkins D, Eccles M, Flottorp S, Guyatt GH, Henry D, Hill S, et al.; GRADE Working Group. Systems for grading the quality of evidence and the strength of recommendations I: critical appraisal of existing approaches the GRADE Working Group. *BMC Health Serv Res* 2004;4:38.
15. Andrews J, Guyatt G, Oxman AD, Alderson P, Dahm P, Falck-Ytter Y, et al. GRADE guidelines: 14. Going from evidence to recommendations: the significance and presentation of recommendations. *J Clin Epidemiol* 2013;66:719-725.
16. Anthenelli RM, Benowitz NL, West R, St Aubin L, McRae T, Lawrence D, et al. Neuropsychiatric safety and efficacy of varenicline, bupropion, and nicotine patch in smokers with and without psychiatric disorders (EAGLES): a double-blind, randomised, placebo-controlled clinical trial. *Lancet* 2016;387:2507-2520.
17. de Dios MA, Anderson BJ, Stanton C, Audet DA, Stein M. Project impact: a pharmacotherapy pilot trial investigating the abstinence and treatment adherence of Latino light smokers. *J Subst Abuse Treat* 2012;43:322-330.
18. Baker TB, Piper ME, Stein JH, Smith SS, Bolt DM, Fraser DL, et al. Effects of nicotine patch vs varenicline vs combination nicotine replacement therapy on smoking cessation at 26 weeks: a randomized clinical trial. *JAMA* 2016;315:371-379.
19. Heydari G, Talischi F, Tafti SF, Masjedi MR. Quitting smoking with varenicline: parallel, randomised efficacy trial in Iran. *Int J Tuberc Lung Dis* 2012;16:268-272.
20. Lerman C, Schnoll RA, Hawk LW Jr, Cinciripini P, George TP, Wileyto EP, et al.; PGRN-PNAT Research Group. Use of the nicotine metabolite ratio as a genetically informed biomarker of response to nicotine patch or varenicline for smoking cessation: a randomised, double-blind placebo-controlled trial. *Lancet Respir Med* 2015;3:131-138.
21. Tulloch HE, Pipe AL, Els C, Clyde MJ, Reid RD. Flexible, dual-form nicotine replacement therapy or varenicline in comparison with nicotine patch for smoking cessation: a randomized controlled trial. *BMC Med* 2016;14:80.
22. Tuisku A, Salmela M, Nieminen P, Toljamo T. Varenicline and nicotine patch therapies in young adults motivated to quit smoking: a randomized, placebo-controlled, prospective study. *Basic Clin Pharmacol Toxicol* 2016;119:78-84.
23. Rohsenow DJ, Tidey JW, Martin RA, Colby SM, Swift RM, Leggio L, et al. Varenicline versus nicotine patch with brief advice for smokers with substance use disorders with or without depression: effects on smoking, substance use and depressive symptoms. *Addiction* 2017;112:1808-1820.
24. Tsukahara H, Noda K, Saku K. A randomized controlled open comparative trial of varenicline vs nicotine patch in adult smokers: efficacy, safety and withdrawal symptoms (the VN-SEESAW study). *Circ J* 2010;74:771-778.
25. Gray KM, McClure EA, Baker NL, Hartwell KJ, Carpenter MJ, Saladin ME. An exploratory short-term double-blind randomized trial of varenicline versus nicotine patch for smoking cessation in women. *Addiction* 2015;110:1027-1034.
26. Ikonomidis I, Marinou M, Vlastos D, Kourea K, Andreadou I, Liarakos N, et al. Effects of varenicline and nicotine replacement therapy on arterial elasticity, endothelial glycocalyx and oxidative stress during a 3-month smoking cessation program. *Atherosclerosis* 2017;262:123-130.
27. Gonzales D, Rennard SI, Nides M, Oncken C, Azoulay S, Billing CB, et al.; Varenicline Phase 3 Study Group. Varenicline, an alpha4beta2 nicotinic acetylcholine receptor partial agonist, vs sustained-release bupropion and placebo for smoking cessation: a randomized controlled trial. *JAMA* 2006;296:47-55.
28. Jorenby DE, Hays JT, Rigotti NA, Azoulay S, Watsky EJ, Williams KE, et al.; Varenicline Phase 3 Study Group. Efficacy of varenicline, an alpha4beta2 nicotinic acetylcholine receptor partial agonist, vs placebo or sustained-release bupropion for smoking cessation: a randomized controlled trial. *JAMA* 2006;296:56-63.
29. Cinciripini PM, Robinson JD, Karam-Hage M, Minnix JA, Lam C, Versace F, et al. Effects of varenicline and bupropion sustained-release use plus intensive smoking cessation counseling on prolonged abstinence from smoking and on depression, negative affect, and other symptoms of nicotine withdrawal. *JAMA Psychiatry* 2013;70:522-533.
30. Gray KM, Carpenter MJ, Lewis AL, Klintworth EM, Upadhyaya HP. Varenicline versus bupropion XL for smoking cessation in older adolescents: a randomized, double-blind pilot trial. *Nicotine Tob Res* 2012;14:234-239.
31. Rollema H, Chambers LK, Coe JW, Glowa J, Hurst RS, Lebel LA, et al. Pharmacological profile of the alpha4beta2 nicotinic acetylcholine receptor partial agonist varenicline, an effective smoking cessation aid. *Neuropharmacology* 2007;52:985-994.
32. Koegelenberg CFN, Noor F, Bateman ED, van Zyl-Smit RN, Bruning A, O'Brien JA, et al. Efficacy of varenicline combined with nicotine replacement therapy vs varenicline alone for smoking cessation: a randomized clinical trial. *JAMA* 2014;312:155-161.
33. Ramon JM, Morchon S, Baena A, Masuet-Aumatell C. Combining varenicline and nicotine patches: a randomized controlled trial study in smoking cessation. *BMC Med* 2014;12:172.
34. Hajek P, Smith KM, Dhanji AR, McRobbie H. Is a combination of varenicline and nicotine patch more effective in helping smokers quit than varenicline alone? A randomised controlled trial. *BMC Med* 2013;11:140.
35. Kandra KL, Ranney LM, Lee JGL, Goldstein AO. Physicians' attitudes and use of E-cigarettes as cessation devices, North Carolina, 2013. *PLoS One* 2014;9:e103462.
36. Steinberg MB, Giovenco DP, Delnevo CD. Patient-physician communication regarding electronic cigarettes. *Prev Med Rep* 2015;2:96-98.
37. Baldassarri SR, Chupp GL, Leone FT, Warren GW, Toll BA. Practice patterns and perceptions of chest health care providers on electronic cigarette use: an in-depth discussion and report of survey results. *J Smok Cessat* 2018;13:72-77.
38. Ioakeimidis N, Vlachopoulos C, Georgakopoulos C, Abdelrasoul M, Skliros N, Katsi V, et al. Smoking cessation rates with varenicline and electronic cigarettes in relapsed smokers with a history of acute coronary syndrome. *Eur Heart J* 2018;39:242.
39. Benmarhnia T, Pierce JP, Leas E, White MM, Strong DR, Noble ML, et al. Can e-cigarettes and pharmaceutical aids increase smoking cessation and reduce cigarette consumption? Findings from a nationally representative cohort of American smokers. *Am J Epidemiol* 2018;187:2397-2404.
40. Hajek P, Phillips-Waller A, Przulj D, Pesola F, Myers Smith K, Bisal N, et al. A randomized trial of E-cigarettes versus nicotine-replacement therapy. *N Engl J Med* 2019;380:629-637.
41. Bullen C, Howe C, Laugesen M, McRobbie H, Parag V, Williman J, et al. Electronic cigarettes for smoking cessation: a randomised controlled trial. *Lancet* 2013;382:1629-1637.
42. Leone FT, Carlsen K-H, Chooljian D, Crotty Alexander LE, Detterbeck FC, Eakin MN, et al. Recommendations for the appropriate structure, communication, and investigation of tobacco harm reduction claims: an official American Thoracic Society policy statement. *Am J Respir Crit Care Med* 2018;198:e90-e105.
43. Li D, Sundar IK, McIntosh S, Ossip DJ, Goniewicz ML, O'Connor RJ, et al. Association of smoking and electronic cigarette use with wheezing and related respiratory symptoms in adults: cross-sectional results from the Population Assessment of Tobacco and Health (PATH) study, wave 2. *Tob Control* 2020;29:140-147.
44. Wang JB, Olgin JE, Nah G, Vittinghoff E, Cataldo JK, Pletcher MJ, et al. Cigarette and e-cigarette dual use and risk of cardiopulmonary symptoms in the Health eHeart Study. *PLoS One* 2018;13:e0198681.

45. Hedman L, Backman H, Stridsman C, Bosson JA, Lundbäck M, Lindberg A, *et al.* Association of electronic cigarette use with smoking habits, demographic factors, and respiratory symptoms. *JAMA Netw Open* 2018;1:e180789.
46. Prochaska JJ, Hilton JF. Risk of cardiovascular serious adverse events associated with varenicline use for tobacco cessation: systematic review and meta-analysis. *BMJ* 2012;344:e2856.
47. Kotz D, Viechtbauer W, Simpson C, van Schayck OCP, West R, Sheikh A. Cardiovascular and neuropsychiatric risks of varenicline: a retrospective cohort study. *Lancet Respir Med* 2015;3:761–768.
48. Office on Smoking and Health. Smoking and tobacco use: electronic cigarettes. Atlanta, GA: CDC; 2019 [accessed 2019 Oct 6]. Available from: [https://www.cdc.gov/tobacco/basic\\_information/e-cigarette/severe-lung-disease.html](https://www.cdc.gov/tobacco/basic_information/e-cigarette/severe-lung-disease.html).
49. Layden JE, Ghinai I, Pray I, Kimball A, Layer M, Tenforde M, *et al.* Pulmonary illness related to e-cigarette use in Illinois and Wisconsin: final report. *N Engl J Med* 2020;382:903–916.
50. Perrine CG, Pickens CM, Boehmer TK, King BA, Jones CM, DeSisto CL, *et al.*; Lung Injury Response Epidemiology/Surveillance Group. Characteristics of a multistate outbreak of lung injury associated with e-cigarette use, or vaping: United States, 2019. *MMWR Morb Mortal Wkly Rep* 2019;68:860–864.
51. Schier JG, Meiman JG, Layden J, Mikosz CA, VanFrank B, King BA, *et al.*; CDC 2019 Lung Injury Response Group. Severe pulmonary disease associated with electronic-cigarette-product use: interim guidance. *MMWR Morb Mortal Wkly Rep* 2019;68:787–790.
52. Bals R, Boyd J, Esposito S, Foronjy R, Hiemstra PS, Jiménez-Ruiz CA, *et al.* Electronic cigarettes: a task force report from the European Respiratory Society. *Eur Respir J* 2019;53:1801151.
53. Schraufnagel DE, Blasi F, Drummond MB, Lam DCL, Latif E, Rosen MJ, *et al.*; Forum of International Respiratory Societies. Electronic cigarettes: a position statement of the forum of international respiratory societies. *Am J Respir Crit Care Med* 2014;190:611–618.
54. Ibero-Latino-American Respiratory Scientific Societies. Declaration of the Ibero-Latino-American respiratory scientific societies on electronic nicotine delivery systems. Montevideo, Uruguay: Latin American Thoracic Association; 2019 [created 2019 May; accessed 2020 Jun 20]. Available from: <https://alatorax.org/es/descargar/adjunto/372-ntdcfs-deln-doc-posicion-may2019-eng.pdf>.
55. Brandon TH, Goniewicz ML, Hanna NH, Hatsukami DK, Herbst RS, Hobin JA, *et al.* Electronic nicotine delivery systems: a policy statement from the American Association for Cancer Research and the American Society of Clinical Oncology. *Clin Cancer Res* 2015;21:514–525.
56. Prochaska JO, DiClemente CC. Stages and processes of self-change of smoking: toward an integrative model of change. *J Consult Clin Psychol* 1983;51:390–395.
57. West R. Time for a change: putting the transtheoretical (stages of change) model to rest. *Addiction* 2005;100:1036–1039.
58. Babb S, Malarcher A, Schauer G, Asman K, Jamal A. Quitting smoking among adults: United States, 2000–2015. *MMWR Morb Mortal Wkly Rep* 2017;65:1457–1464.
59. Ebbert JO, Hughes JR, West RJ, Rennard SI, Russ C, McRae TD, *et al.* Effect of varenicline on smoking cessation through smoking reduction: a randomized clinical trial. *JAMA* 2015;313:687–694.
60. Steinberg ML, Lu S-E, Williams JM. Varenicline for smoking reduction in smokers not yet ready to quit: a double-blind, proof-of-concept randomized clinical trial. *Addict Behav* 2018;84:20–26.
61. Rennard S, Hughes J, Cincirpini PM, Kralikova E, Raupach T, Arteaga C, *et al.*; Flexible Quit Date Study Group. A randomized placebo-controlled trial of varenicline for smoking cessation allowing flexible quit dates. *Nicotine Tob Res* 2012;14:343–350.
62. Hughes JR, Rennard SI, Fingar JR, Talbot SK, Callas PW, Fagerstrom KO. Efficacy of varenicline to prompt quit attempts in smokers not currently trying to quit: a randomized placebo-controlled trial. *Nicotine Tob Res* 2011;13:955–964.
63. Brandon TH, Drobes DJ, Unrod M, Heckman BW, Oliver JA, Roetzheim RC, *et al.* Varenicline effects on craving, cue reactivity, and smoking reward. *Psychopharmacology (Berl)* 2011;218:391–403.
64. Marti J. Assessing preferences for improved smoking cessation medications: a discrete choice experiment. *Eur J Health Econ* 2012;13:533–548.
65. Aumann I, Treskova M, Hagemann N, von der Schulenburg J-M. Analysis of driving factors of willingness to use and willingness to pay for existing pharmacological smoking cessation aids among young and middle-aged adults in Germany. *Appl Health Econ Health Policy* 2016;14:441–452.
66. Choo EK, Sullivan AF, LoVecchio F, Perret JN, Camargo CA Jr, Boudreaux ED. Patient preferences for emergency department-initiated tobacco interventions: a multicenter cross-sectional study of current smokers. *Addict Sci Clin Pract* 2012;7:4.
67. Paterson RW, Boyle KJ, Parmeter CF, Neumann JE, De Civita P. Heterogeneity in preferences for smoking cessation. *Health Econ* 2008;17:1363–1377.
68. Rogers K. The best drug for quitting smoking can't shake its suicide stigma. *VICE News* 2015 Nov 24 [accessed 2019 Oct 9]. Available from: [https://www.vice.com/en\\_us/article/vv7gym/the-best-drug-for-quitting-smoking-cant-shake-its-suicide-stigma](https://www.vice.com/en_us/article/vv7gym/the-best-drug-for-quitting-smoking-cant-shake-its-suicide-stigma).
69. Lancaster T, Hajek P, Stead LF, West R, Jarvis MJ. Prevention of relapse after quitting smoking: a systematic review of trials. *Arch Intern Med* 2006;166:828–835.
70. Schnoll R, Leone F, Veluz-Wilkins A, Miele A, Hole A, Jao NC, *et al.* A randomized controlled trial of 24 weeks of varenicline for tobacco use among cancer patients: efficacy, safety, and adherence. *Psychooncology* 2019;28:561–569.
71. Stapleton JA, Russell MA, Feyerabend C, Wiseman SM, Gustavsson G, Sawe U, *et al.* Dose effects and predictors of outcome in a randomized trial of transdermal nicotine patches in general practice. *Addiction* 1995;90:31–42.
72. Tønnesen P, Paoletti P, Gustavsson G, Russell MA, Saracci R, Gulsvik A, *et al.* Higher dosage nicotine patches increase one-year smoking cessation rates: results from the European CEASE trial. Collaborative European Anti-Smoking Evaluation. European Respiratory Society. *Eur Respir J* 1999;13:238–246.
73. Hays JT, Hurt RD, Rigotti NA, Niaura R, Gonzales D, Durcan MJ, *et al.* Sustained-release bupropion for pharmacologic relapse prevention after smoking cessation. a randomized, controlled trial. *Ann Intern Med* 2001;135:423–433.
74. Pomerleau OF, Pomerleau CS, Marks JL, Snedecor SM, Mehringer AM, Namemek Brouwer RJ, *et al.* Prolonged nicotine patch use in quitters with past abstinence-induced depressed mood. *J Subst Abuse Treat* 2003;24:13–18.
75. Dale Horst W, Klein MW, Williams D, Werder SF. Extended use of nicotine replacement therapy to maintain smoking cessation in persons with schizophrenia. *Neuropsychiatr Dis Treat* 2005;1:349–355.
76. Tonstad S, Tønnesen P, Hajek P, Williams KE, Billing CB, Reeves KR; Varenicline Phase 3 Study Group. Effect of maintenance therapy with varenicline on smoking cessation: a randomized controlled trial. *JAMA* 2006;296:64–71.
77. Croghan IT, Hurt RD, Dakhil SR, Croghan GA, Sloan JA, Novotny PJ, *et al.* Randomized comparison of a nicotine inhaler and bupropion for smoking cessation and relapse prevention. *Mayo Clin Proc* 2007;82:186–195.
78. Schnoll RA, Patterson F, Wileyto EP, Heitjan DF, Shields AE, Asch DA, *et al.* Effectiveness of extended-duration transdermal nicotine therapy: a randomized trial. *Ann Intern Med* 2010;152:144–151.
79. Evins AE, Cather C, Pratt SA, Pachas GN, Hoepfner SS, Goff DC, *et al.* Maintenance treatment with varenicline for smoking cessation in patients with schizophrenia and bipolar disorder: a randomized clinical trial. *JAMA* 2014;311:145–154.
80. Schnoll RA, Goelz PM, Veluz-Wilkins A, Blazekovic S, Powers L, Leone FT, *et al.* Long-term nicotine replacement therapy: a randomized clinical trial. *JAMA Intern Med* 2015;175:504–511.
81. Schlam TR, Fiore MC, Smith SS, Fraser D, Bolt DM, Collins LM, *et al.* Comparative effectiveness of intervention components for producing long-term abstinence from smoking: a factorial screening experiment. *Addiction* 2016;111:142–155.
